# Supplementary material for: Peripheral Blood Gene Expression as a Novel Genomic Biomarker in Complicated Sarcoidosis
Source: PLOS journal article supplement (doi:10.1371/journal.pone.0044818), 2012-09-12
Supplement: S1 (10.1371/journal.pone.0044818.s001) [file journal.pone.0044818.s001]

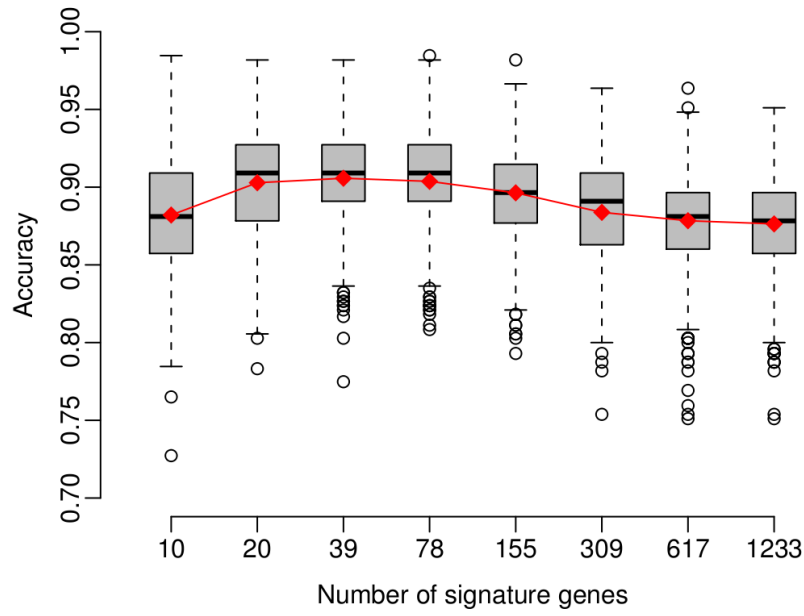

**Figure S1. Distribution of the classification accuracy in each RFE step.** X-axis: the number of genes in each step; Y-axis: the classification accuracy from a five-fold cross-validation (repeated 1,000 times). The red line shows the average accuracy for each RFE step.
