# Supplementary material for: Peripheral Blood Gene Expression as a Novel Genomic Biomarker in Complicated Sarcoidosis
Source: PLOS journal article supplement (doi:10.1371/journal.pone.0044818), 2012-09-12
Supplement: S2 (10.1371/journal.pone.0044818.s002) [file journal.pone.0044818.s002]

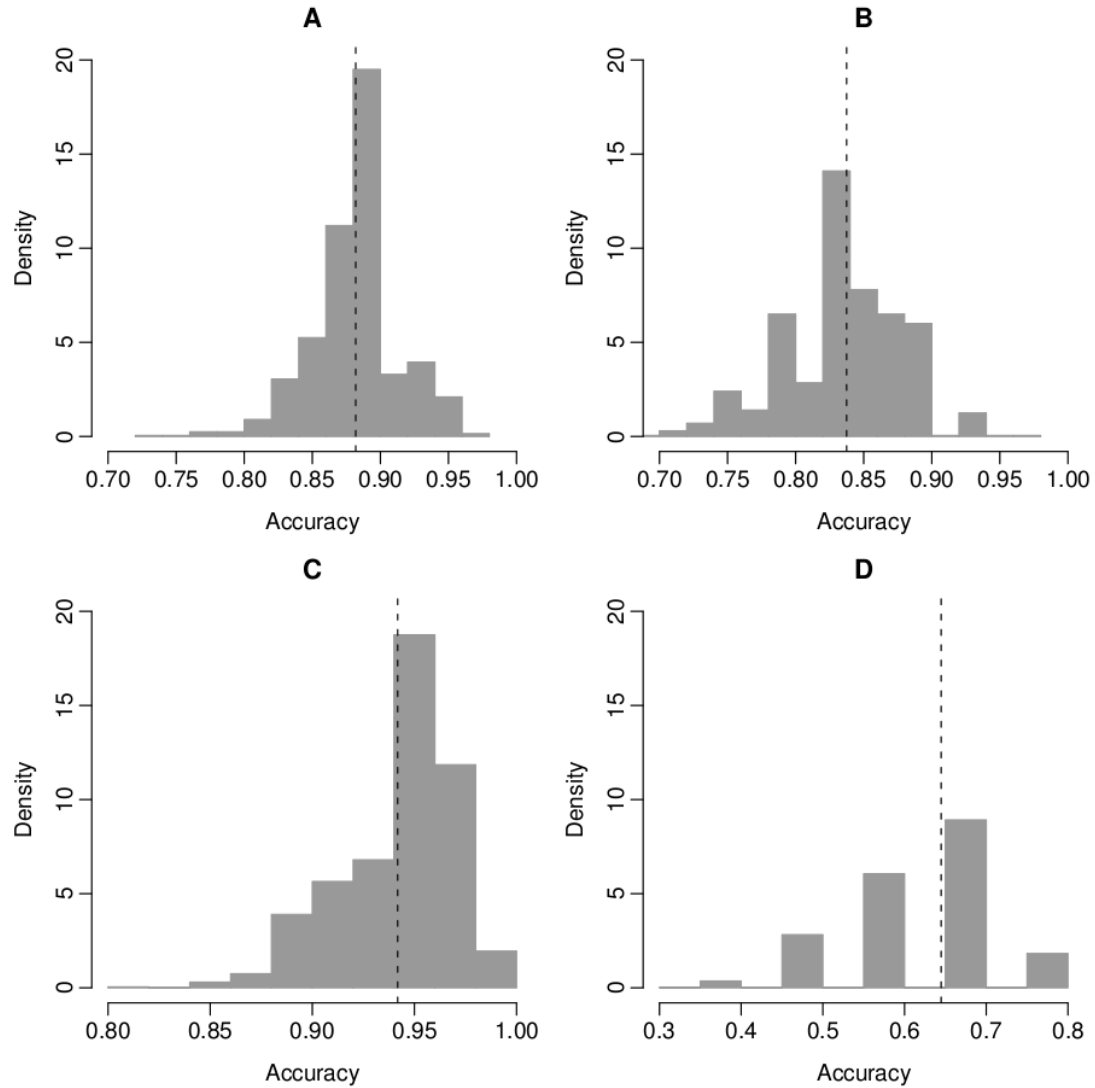

**Figure S2. Distribution of classification accuracies of the 20-gene signature.** X-axis: the classification accuracy from a five-fold cross-validation (repeated 1,000 times). The dashed lines indicate the average classification accuracy. (A) All sarcoidosis patients versus healthy controls in the AA samples; (B) Patients with complicated sarcoidosis versus patients with uncomplicated sarcoidosis in the AA samples; (C) All sarcoidosis patients versus healthy controls in the EA samples; and (D) Patients with complicated sarcoidosis versus patients with uncomplicated sarcoidosis in the EA samples.
