# Supplementary material for: Peripheral Blood Gene Expression as a Novel Genomic Biomarker in Complicated Sarcoidosis
Source: PLOS journal article supplement (doi:10.1371/journal.pone.0044818), 2012-09-12
Supplement: S3 (10.1371/journal.pone.0044818.s003) [file journal.pone.0044818.s003]

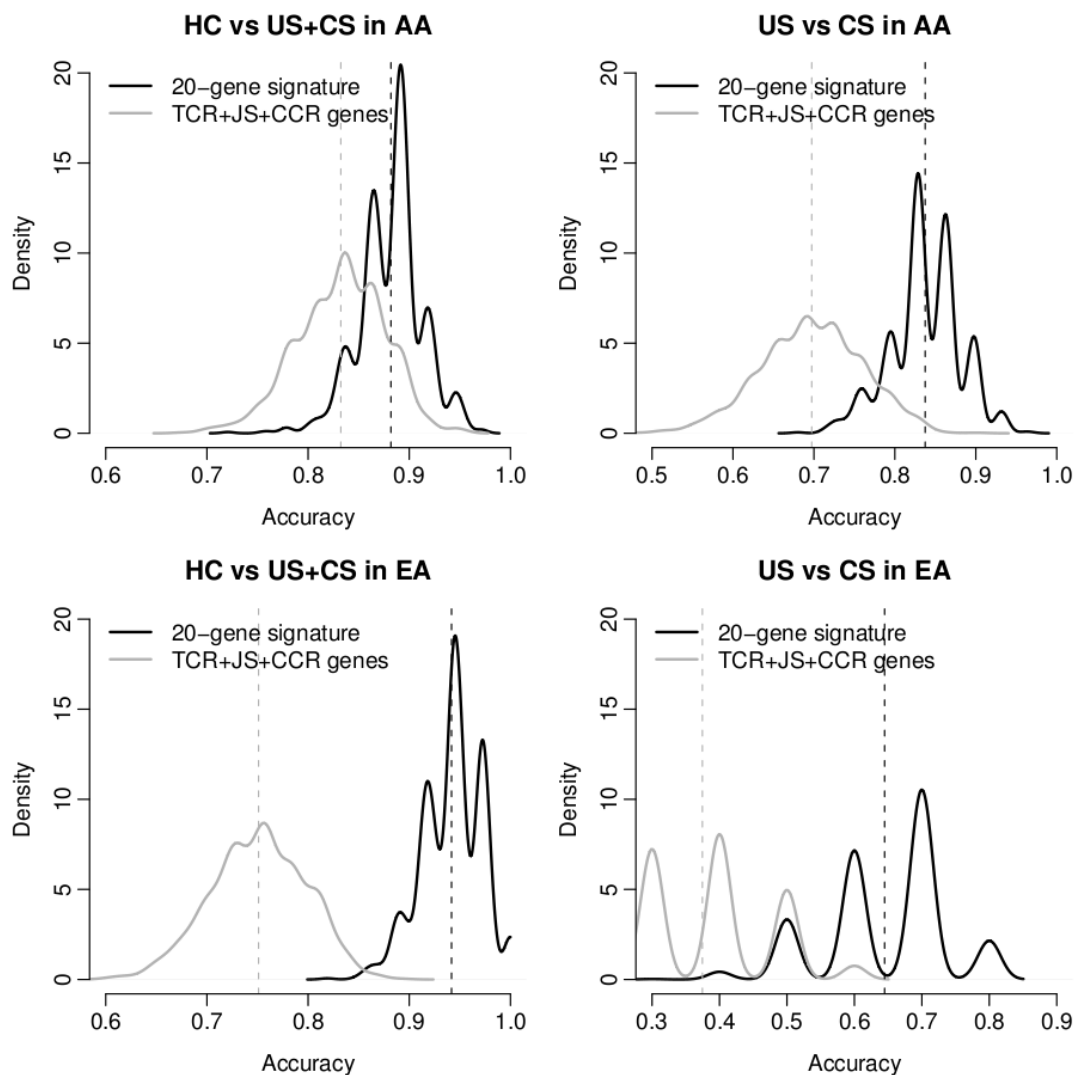

**Figure S3. Comparison between the 20-gene signature and the TCR/JS/CCR signaling pathway gene signature in individual populations.** The distribution of accuracy is based on 1,000 times of five-fold cross-validation. The dashed lines indicate the average classification accuracy for the 20-gene signature or the TCR/JS/CCR signaling pathway gene signature. HC: healthy controls; US: patients with uncomplicated sarcoidosis; and CS: patients with complicated sarcoidosis.
