# Supplementary material for: Peripheral Blood Gene Expression as a Novel Genomic Biomarker in Complicated Sarcoidosis
Source: PLOS journal article supplement (doi:10.1371/journal.pone.0044818), 2012-09-12
Supplement: S4 (10.1371/journal.pone.0044818.s004) [file journal.pone.0044818.s004]

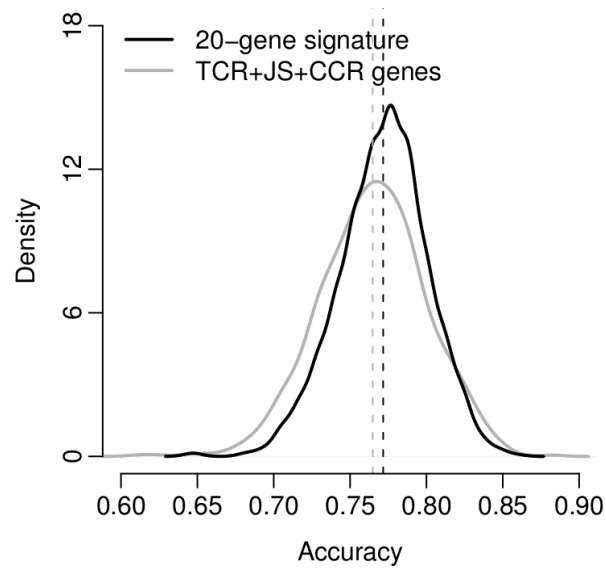

**Figure S4. Capability of the the 20-gene signature and the TCR/JS/CCR signaling pathway gene signature in separating sarcoidosis patients from IPF patients.** The distribution of accuracy is based on 1,000 times of five-fold cross-validation. The dashed lines indicate the average classification accuracy for the 20-gene signature or the TCR/JS/CCR signaling pathway gene signature.
