# Supplementary material for: Peripheral Blood Gene Expression as a Novel Genomic Biomarker in Complicated Sarcoidosis
Source: PLOS journal article supplement (doi:10.1371/journal.pone.0044818), 2012-09-12
Supplement: S5 (10.1371/journal.pone.0044818.s005) [file journal.pone.0044818.s005.pdf › journal.pone.0044818.s005.pdf]

**Table S1.** SNPs significantly associated with sarcoidosis within the 31 TCR/JS/CRR signature genes ( $P < 0.01$ ).

| Population        | SNP chromosome | dbSNP RS ID | Gene symbol | Gene relationship | Sarcoidosis vs healthy controls |       | Complicated sarcoidosis vs uncomplicated sarcoidosis |       |
|-------------------|----------------|-------------|-------------|-------------------|---------------------------------|-------|------------------------------------------------------|-------|
|                   |                |             |             |                   | P                               | OR    | P                                                    | OR    |
| African Americans | 1              | rs2131817   | AKT3        | upstream          | 1.4E-05                         | 2.061 | 3.8E-03                                              | 2.087 |
|                   | 3              | rs2953040   | CBLB        | upstream          | 1.8E-05                         | 0.584 | 3.8E-05                                              | 0.344 |
|                   | 10             | rs2256867   | IL2RA       | intron            | 1.8E-04                         | 1.823 |                                                      |       |
|                   | 5              | rs11567719  | IL7R        | intron            | 3.1E-04                         | 2.051 |                                                      |       |
|                   | 3              | rs9855440   | CBLB        | upstream          | 3.4E-04                         | 0.648 |                                                      |       |
|                   | 15             | rs8032887   | SPRED1      | upstream          | 8.1E-04                         | 0.329 |                                                      |       |
|                   | 1              | rs1458023   | AKT3        | intron            | 8.7E-04                         | 0.659 |                                                      |       |
|                   | 12             | rs10492199  | IFNG        | downstream        | 8.8E-04                         | 1.899 |                                                      |       |
|                   | 3              | rs17202341  | CBLB        | intron            | 1.0E-03                         | 0.461 |                                                      |       |
|                   | 3              | rs6791765   | CBLB        | intron            | 1.8E-03                         | 1.717 |                                                      |       |
|                   | 3              | rs9831914   | CBLB        | upstream          | 2.9E-03                         | 0.587 |                                                      |       |
|                   | 10             | rs2245675   | IL2RA       | intron            | 3.3E-03                         | 0.645 |                                                      |       |
|                   | 10             | rs1887027   | IL2RA       | upstream          | 3.5E-03                         | 1.453 |                                                      |       |
|                   | 22             | rs11089825  | IL2RB       | upstream          | 4.4E-03                         | 0.446 |                                                      |       |
|                   | 10             | rs2476491   | IL2RA       | intron            | 5.3E-03                         | 0.615 |                                                      |       |
|                   | 3              | rs2676364   | CBLB        | upstream          | 5.6E-03                         | 1.442 |                                                      |       |
|                   | 12             | rs10784673  | IFNG        | downstream        | 5.9E-03                         | 1.526 |                                                      |       |
|                   | 3              | rs7620084   | CBLB        | upstream          | 7.3E-03                         | 0.611 |                                                      |       |
|                   | 12             | rs4332594   | CCND2       | downstream        | 8.1E-03                         | 0.562 |                                                      |       |
|                   | 10             | rs6602364   | IL2RA       | downstream        | 8.2E-03                         | 0.721 |                                                      |       |
|                   | 1              | rs2131817   | AKT3        | upstream          | 1.4E-05                         | 2.061 | 3.8E-03                                              | 2.087 |
|                   | 3              | rs2953040   | CBLB        | upstream          | 1.8E-05                         | 0.584 | 3.8E-05                                              | 0.344 |
|                   | 5              | rs11567719  | IL7R        | intron            | 3.1E-04                         | 2.051 |                                                      |       |
|                   | 3              | rs9855440   | CBLB        | upstream          | 3.4E-04                         | 0.648 |                                                      |       |
|                   | 1              | rs1458023   | AKT3        | intron            | 8.7E-04                         | 0.659 |                                                      |       |
|                   | 12             | rs10492199  | IFNG        | downstream        | 8.8E-04                         | 1.899 |                                                      |       |
|                   | 3              | rs17202341  | CBLB        | intron            | 1.0E-03                         | 0.461 |                                                      |       |
|                   | 1              | rs2716129   | JUN         | upstream          | 1.1E-03                         | 0.667 |                                                      |       |
|                   | 3              | rs6791765   | CBLB        | intron            | 1.8E-03                         | 1.717 |                                                      |       |
|                   | 20             | rs12106125  | NFATC2      | intron            | 2.7E-03                         | 0.405 |                                                      |       |
|                   | 3              | rs9831914   | CBLB        | upstream          | 2.9E-03                         | 0.587 |                                                      |       |
|                   | 20             | rs8119787   | NFATC2      | intron            | 3.5E-03                         | 1.423 |                                                      |       |
|                   | 20             | rs6102292   | PLCG1       | intron            | 3.6E-03                         | 1.561 |                                                      |       |
|                   | 1              | rs6684750   | JUN         | upstream          | 3.8E-03                         | 1.505 |                                                      |       |
|                   | 5              | rs163433    | ITK         | intron            | 3.9E-03                         | 0.689 |                                                      |       |

|                       |    |            |        |            |         |       |         |       |
|-----------------------|----|------------|--------|------------|---------|-------|---------|-------|
|                       | 11 | rs12788933 | CD3E   | upstream   | 4.9E-03 | 1.772 |         |       |
|                       | 18 | rs8094200  | MALT1  | downstream | 5.4E-03 | 1.404 |         |       |
|                       | 1  | rs1773560  | CD247  | intron     | 5.5E-03 | 0.580 |         |       |
|                       | 3  | rs2676364  | CBLB   | upstream   | 5.6E-03 | 1.442 |         |       |
|                       | 12 | rs10784673 | IFNG   | downstream | 5.9E-03 | 1.526 |         |       |
|                       | 1  | rs1723018  | CD247  | intron     | 6.4E-03 | 0.678 |         |       |
|                       | 3  | rs7620084  | CBLB   | upstream   | 7.3E-03 | 0.611 |         |       |
|                       | 18 | rs7231244  | MALT1  | upstream   | 9.0E-03 | 0.584 |         |       |
|                       | 1  | rs7556224  | JUN    | upstream   | 1.0E-02 | 0.730 |         |       |
| European<br>Americans | 3  | rs7614488  | CBLB   | upstream   | 7.8E-07 | 2.495 |         |       |
|                       | 3  | rs2953040  | CBLB   | upstream   | 1.6E-04 | 1.615 | 3.7E-04 | 0.379 |
|                       | 3  | rs4855606  | CBLB   | upstream   | 5.0E-04 | 0.344 |         |       |
|                       | 3  | rs16853082 | CBLB   | upstream   | 1.2E-03 | 0.514 |         |       |
|                       | 3  | rs11712635 | CBLB   | upstream   | 1.3E-03 | 1.830 |         |       |
|                       | 3  | rs2248981  | CBLB   | upstream   | 1.5E-03 | 0.664 |         |       |
|                       | 3  | rs767151   | CBLB   | upstream   | 1.7E-03 | 1.808 |         |       |
|                       | 3  | rs1520717  | CBLB   | upstream   | 1.7E-03 | 0.646 |         |       |
|                       | 22 | rs11089825 | IL2RB  | upstream   | 2.2E-03 | 0.591 |         |       |
|                       | 3  | rs6791765  | CBLB   | intron     | 2.5E-03 | 1.835 |         |       |
|                       | 3  | rs7641825  | CBLB   | intron     | 2.8E-03 | 1.585 |         |       |
|                       | 15 | rs17561445 | SPRED1 | upstream   | 2.8E-03 | 1.672 | 1.8E-03 | 0.288 |
|                       | 3  | rs2049118  | CBLB   | upstream   | 3.4E-03 | 0.660 |         |       |
|                       | 3  | rs2655019  | CBLB   | upstream   | 3.4E-03 | 0.644 |         |       |
|                       | 3  | rs9863794  | CBLB   | upstream   | 3.5E-03 | 1.554 |         |       |
|                       | 12 | rs2870957  | IFNG   | downstream | 3.9E-03 | 1.504 |         |       |
|                       | 3  | rs16852512 | CBLB   | upstream   | 4.7E-03 | 0.701 |         |       |
|                       | 3  | rs9826409  | CBLB   | upstream   | 5.3E-03 | 1.898 |         |       |
|                       | 3  | rs10433373 | CBLB   | downstream | 6.5E-03 | 1.511 |         |       |
|                       | 3  | rs767150   | CBLB   | upstream   | 6.9E-03 | 1.696 |         |       |
|                       | 3  | rs10511245 | CBLB   | downstream | 6.9E-03 | 1.506 |         |       |
|                       | 3  | rs9845005  | CBLB   | upstream   | 7.5E-03 | 1.461 |         |       |
|                       | 3  | rs10433370 | CBLB   | downstream | 8.7E-03 | 1.489 |         |       |
|                       | 1  | rs2131817  | AKT3   | upstream   | 8.8E-03 | 0.633 | 2.3E-06 | 4.143 |
|                       | 3  | rs9838585  | CBLB   | downstream | 8.9E-03 | 1.513 |         |       |
|                       | 3  | rs9288812  | CBLB   | downstream | 9.1E-03 | 1.484 |         |       |
|                       | 3  | rs4895039  | CBLB   | upstream   | 9.4E-03 | 0.694 |         |       |
|                       | 3  | rs7618427  | CBLB   | upstream   | 9.6E-03 | 0.605 |         |       |
|                       | 3  | rs6779049  | CBLB   | upstream   | 9.8E-03 | 0.690 |         |       |
|                       | 3  | rs7614488  | CBLB   | upstream   | 7.8E-07 | 2.495 |         |       |
|                       | 3  | rs2953040  | CBLB   | upstream   | 1.6E-04 | 1.615 | 3.7E-04 | 0.379 |
|                       | 3  | rs4855606  | CBLB   | upstream   | 5.0E-04 | 0.344 |         |       |

|    |            |       |            |         |       |         |       |
|----|------------|-------|------------|---------|-------|---------|-------|
| 3  | rs16853082 | CBLB  | upstream   | 1.2E-03 | 0.514 |         |       |
| 3  | rs11712635 | CBLB  | upstream   | 1.3E-03 | 1.830 |         |       |
| 3  | rs2248981  | CBLB  | upstream   | 1.5E-03 | 0.664 |         |       |
| 3  | rs767151   | CBLB  | upstream   | 1.7E-03 | 1.808 |         |       |
| 3  | rs1520717  | CBLB  | upstream   | 1.7E-03 | 0.646 |         |       |
| 3  | rs6791765  | CBLB  | intron     | 2.5E-03 | 1.835 |         |       |
| 3  | rs7641825  | CBLB  | intron     | 2.8E-03 | 1.585 |         |       |
| 3  | rs2049118  | CBLB  | upstream   | 3.4E-03 | 0.660 |         |       |
| 3  | rs2655019  | CBLB  | upstream   | 3.4E-03 | 0.644 |         |       |
| 3  | rs9863794  | CBLB  | upstream   | 3.5E-03 | 1.554 |         |       |
| 12 | rs2870957  | IFNG  | downstream | 3.9E-03 | 1.504 |         |       |
| 3  | rs16852512 | CBLB  | upstream   | 4.7E-03 | 0.701 |         |       |
| 3  | rs9826409  | CBLB  | upstream   | 5.3E-03 | 1.898 |         |       |
| 18 | rs878875   | MALT1 | downstream | 5.7E-03 | 1.431 |         |       |
| 3  | rs10433373 | CBLB  | downstream | 6.5E-03 | 1.511 |         |       |
| 2  | rs11689629 | CD28  | downstream | 6.5E-03 | 0.643 |         |       |
| 5  | rs25781    | ITK   | intron     | 6.6E-03 | 0.698 |         |       |
| 3  | rs767150   | CBLB  | upstream   | 6.9E-03 | 1.696 |         |       |
| 3  | rs10511245 | CBLB  | downstream | 6.9E-03 | 1.506 |         |       |
| 3  | rs9845005  | CBLB  | upstream   | 7.5E-03 | 1.461 |         |       |
| 3  | rs10433370 | CBLB  | downstream | 8.7E-03 | 1.489 |         |       |
| 1  | rs2131817  | AKT3  | upstream   | 8.8E-03 | 0.633 | 2.3E-06 | 4.143 |
| 3  | rs9838585  | CBLB  | downstream | 8.9E-03 | 1.513 |         |       |
| 3  | rs9288812  | CBLB  | downstream | 9.1E-03 | 1.484 |         |       |
| 3  | rs4895039  | CBLB  | upstream   | 9.4E-03 | 0.694 |         |       |
| 3  | rs7618427  | CBLB  | upstream   | 9.6E-03 | 0.605 |         |       |
| 5  | rs25780    | ITK   | intron     | 9.6E-03 | 0.711 |         |       |
| 3  | rs3773853  | DLG1  | intron     | 9.7E-03 | 1.384 |         |       |
| 3  | rs6779049  | CBLB  | upstream   | 9.8E-03 | 0.690 |         |       |

GWAS results between complicated and uncomplicated sarcoidosis were listed only for the SNPs with  $P < 0.01$ . OR: odds ratio.
