# Supplementary material for: Peripheral Blood Gene Expression as a Novel Genomic Biomarker in Complicated Sarcoidosis
Source: PLOS journal article supplement (doi:10.1371/journal.pone.0044818), 2012-09-12
Supplement: S6 (10.1371/journal.pone.0044818.s006) [file journal.pone.0044818.s006.pdf › journal.pone.0044818.s006.pdf]

**Table S2.** PubMatrix search results for the TCR/JS/CCR signature genes against sarcoidosis-related search terms.

| Gene           | Sarcoidosis | Tuberculosis | Granulomatous disease | Hypersensitivity pneumonitis | Pulmonary fibrosis |
|----------------|-------------|--------------|-----------------------|------------------------------|--------------------|
| <i>CD247</i>   | 0           | 0            | 0                     | 0                            | 0                  |
| <i>CD28</i>    | 9           | 38           | 20                    | 6                            | 8                  |
| <i>CD3D</i>    | 0           | 0            | 0                     | 0                            | 0                  |
| <i>CD3E</i>    | 0           | 0            | 0                     | 0                            | 0                  |
| <i>CD3G</i>    | 0           | 0            | 0                     | 0                            | 0                  |
| <i>CD8A</i>    | 0           | 0            | 0                     | 0                            | 0                  |
| <i>CBLB</i>    | 0           | 0            | 0                     | 0                            | 0                  |
| <i>GRAP2</i>   | 0           | 0            | 0                     | 0                            | 0                  |
| <i>ITK</i>     | 0           | 0            | 0                     | 0                            | 1                  |
| <i>NCK1</i>    | 0           | 0            | 0                     | 0                            | 0                  |
| <i>RASGRP1</i> | 0           | 0            | 0                     | 0                            | 0                  |
| <i>DLG1</i>    | 0           | 0            | 0                     | 0                            | 0                  |
| <i>ICOS</i>    | 0           | 3            | 1                     | 0                            | 0                  |
| <i>IFNG</i>    | 188         | 3629         | 432                   | 43                           | 341                |
| <i>IL7R</i>    | 2           | 8            | 4                     | 0                            | 0                  |
| <i>JUN</i>     | 0           | 1            | 3                     | 1                            | 28                 |
| <i>LCK</i>     | 1           | 3            | 0                     | 0                            | 1                  |
| <i>MAPK9</i>   | 0           | 1            | 0                     | 0                            | 0                  |
| <i>MALT1</i>   | 0           | 0            | 0                     | 0                            | 0                  |
| <i>NFATC2</i>  | 0           | 0            | 0                     | 0                            | 0                  |
| <i>NFATC3</i>  | 0           | 0            | 0                     | 0                            | 0                  |
| <i>PIK3CA</i>  | 0           | 0            | 0                     | 0                            | 1                  |
| <i>PLCG1</i>   | 0           | 2            | 3                     | 0                            | 3                  |
| <i>AKT3</i>    | 3           | 14           | 2                     | 1                            | 31                 |
| <i>ZAP70</i>   | 0           | 0            | 0                     | 0                            | 0                  |
| <i>CCND2</i>   | 0           | 0            | 0                     | 0                            | 0                  |
| <i>IL2RA</i>   | 3           | 27           | 5                     | 1                            | 2                  |
| <i>IL2RB</i>   | 10          | 43           | 8                     | 3                            | 4                  |
| <i>STAT4</i>   | 1           | 7            | 2                     | 0                            | 2                  |
| <i>SPRED1</i>  | 0           | 0            | 0                     | 0                            | 0                  |
| <i>SOCS4</i>   | 0           | 6            | 1                     | 0                            | 4                  |

Each number in the table represents the count of literatures containing the corresponding gene name and search term.
