# Supplementary material for: Peripheral Blood Gene Expression as a Novel Genomic Biomarker in Complicated Sarcoidosis
Source: PLOS journal article supplement (doi:10.1371/journal.pone.0044818), 2012-09-12
Supplement: S7 (10.1371/journal.pone.0044818.s007) [file journal.pone.0044818.s007.pdf › journal.pone.0044818.s007.pdf]

**Table S3.** Patient therapy description.

| <b>ID</b>  | <b>Complicated Sarcoidosis</b> | <b>Prednisone mg/day</b> | <b>MTX mg/week</b> | <b>Micophenolate mg/day</b> | <b>anti TNF therapy</b> |
|------------|--------------------------------|--------------------------|--------------------|-----------------------------|-------------------------|
| Patient 1  | No                             | 10                       |                    |                             |                         |
| Patient 2  | No                             | 2.5                      |                    |                             |                         |
| Patient 3  | No                             | 40                       |                    |                             |                         |
| Patient 4  | No                             |                          | 12                 |                             |                         |
| Patient 5  | No                             |                          |                    |                             |                         |
| Patient 6  | No                             | 10                       |                    |                             |                         |
| Patient 7  | No                             | 5                        |                    |                             |                         |
| Patient 8  | No                             |                          |                    |                             |                         |
| Patient 9  | No                             |                          |                    |                             |                         |
| Patient 10 | No                             |                          |                    | 250                         |                         |
| Patient 11 | No                             | 15                       |                    |                             |                         |
| Patient 12 | No                             |                          |                    |                             |                         |
| Patient 13 | No                             |                          | 12.5               |                             |                         |
| Patient 14 | No                             |                          |                    |                             |                         |
| Patient 15 | No                             | 40                       | 12.5               |                             |                         |
| Patient 16 | No                             |                          |                    |                             |                         |
| Patient 17 | No                             |                          |                    |                             |                         |
| Patient 18 | Yes                            | 40                       |                    |                             |                         |
| Patient 19 | Yes                            | 10                       | 10                 |                             |                         |
| Patient 20 | Yes                            | 10                       |                    |                             |                         |
| Patient 21 | Yes                            | 10                       | 10                 |                             |                         |
| Patient 22 | Yes                            |                          | 10                 |                             |                         |
| Patient 23 | Yes                            | 10                       |                    |                             |                         |
| Patient 24 | Yes                            | 6.25                     |                    | 500                         |                         |
| Patient 25 | Yes                            |                          | 7.5                |                             |                         |
| Patient 26 | Yes                            |                          |                    | 500                         | Yes                     |
| Patient 27 | Yes                            |                          | 10                 |                             |                         |
| Patient 28 | Yes                            | 5                        | 15                 |                             |                         |
| Patient 29 | Yes                            |                          | 12                 |                             |                         |
| Patient 30 | Yes                            |                          |                    |                             |                         |
| Patient 31 | Yes                            |                          | 10                 |                             | Yes                     |
| Patient 32 | Yes                            | 5                        |                    |                             |                         |
| Patient 33 | Yes                            | 15                       |                    |                             |                         |
| Patient 34 | Yes                            | 20                       | 17.5               |                             |                         |
| Patient 35 | Yes                            | 5                        |                    |                             |                         |
| Patient 36 | Yes                            | 6                        |                    | 1000                        |                         |
| Patient 37 | Yes                            |                          |                    |                             |                         |
| Patient 38 | Yes                            | 10                       |                    |                             | Yes                     |
| Patient 39 | Yes                            | 20                       |                    |                             | Yes                     |
